# Supplementary material
Source: publisher site journal article supplement (https://www.spandidos-publications.com/7516/downloadSupplementary)
Supplement: Supplementary file 1 [file downloadSupplementary]

Table SI. Primers for Sanger sequencing.

| Gene         | Genomic coordinates <sup>a</sup> | Product length, bp | Forward primer, 5'→3'   | Reverse primer, 5'→3' |
|--------------|----------------------------------|--------------------|-------------------------|-----------------------|
| <i>CNGA3</i> | chr2:99006074+99006417           | 344                | ACAGTCTTGGAGCACAGTGC    | TCTGATGGTCCTCTTGGGGA  |
| <i>CNGA3</i> | chr2:99012434+99012834           | 401                | CACAAACTACCCAGAAGTGAGGT | AGCCCACATTGCCACAA     |

<sup>a</sup>Based on Genome Reference Consortium Human Build 37. *CNGA3*, cyclic nucleotide-gated channel subunit a 3.

Table SII. CDS sequence of the protein encoded by *CNGA3*.

| Gene                                                                                                                                                               | CNGA3                                                                                                                                                                                                                                                                                                                                                                                                                                                                                                                                                                                                                                                                                                                                                                                                                                                                                                                                                                                                                                                                                                                                                                                                                                                                                                                                                                                                                                                                                                                                                                                                                                                                                                                                                                                                                                                                                                                                                                                                                                                                                                                                                                                                                                                                                                      |
|--------------------------------------------------------------------------------------------------------------------------------------------------------------------|------------------------------------------------------------------------------------------------------------------------------------------------------------------------------------------------------------------------------------------------------------------------------------------------------------------------------------------------------------------------------------------------------------------------------------------------------------------------------------------------------------------------------------------------------------------------------------------------------------------------------------------------------------------------------------------------------------------------------------------------------------------------------------------------------------------------------------------------------------------------------------------------------------------------------------------------------------------------------------------------------------------------------------------------------------------------------------------------------------------------------------------------------------------------------------------------------------------------------------------------------------------------------------------------------------------------------------------------------------------------------------------------------------------------------------------------------------------------------------------------------------------------------------------------------------------------------------------------------------------------------------------------------------------------------------------------------------------------------------------------------------------------------------------------------------------------------------------------------------------------------------------------------------------------------------------------------------------------------------------------------------------------------------------------------------------------------------------------------------------------------------------------------------------------------------------------------------------------------------------------------------------------------------------------------------|
| NCBI mRNA RefSeq                                                                                                                                                   | NM_001298.3                                                                                                                                                                                                                                                                                                                                                                                                                                                                                                                                                                                                                                                                                                                                                                                                                                                                                                                                                                                                                                                                                                                                                                                                                                                                                                                                                                                                                                                                                                                                                                                                                                                                                                                                                                                                                                                                                                                                                                                                                                                                                                                                                                                                                                                                                                |
| Definition                                                                                                                                                         | Homo sapiens cyclic nucleotide gated channel subunit a 3 (CNGA3), transcript variant 1, mRNA                                                                                                                                                                                                                                                                                                                                                                                                                                                                                                                                                                                                                                                                                                                                                                                                                                                                                                                                                                                                                                                                                                                                                                                                                                                                                                                                                                                                                                                                                                                                                                                                                                                                                                                                                                                                                                                                                                                                                                                                                                                                                                                                                                                                               |
| CDS coordinates                                                                                                                                                    | 117-2,201                                                                                                                                                                                                                                                                                                                                                                                                                                                                                                                                                                                                                                                                                                                                                                                                                                                                                                                                                                                                                                                                                                                                                                                                                                                                                                                                                                                                                                                                                                                                                                                                                                                                                                                                                                                                                                                                                                                                                                                                                                                                                                                                                                                                                                                                                                  |
| CDS sequence                                                                                                                                                       | <p>ATGGCCAAGATCAACACCCAATACTCCCACCCCTCCAGGACCCACCTCAAGGTAAAGACCTCAGACCGAGATCTCAATCGCGCTGAAAAT<br/> GGCCTCAGCAGAGCCCCTCGTCAAGTGAGGAGACATCGTCAGTGCTGCAGCCGGGGATCGCCATGGAGACCAGAGGACTGGCTGACTC<br/> CGGGCAGGGCTCCTTACCGGCCAGGGGATCGCCAGGCTGTCGCGCCTCATCTTCTTGCTGCGCAGGTGGGCTGCCAGGCATGTGCACCA<br/> CCAGGACCAGGGACCGGACTCTTTTCTGATCGTTTCCGTGGAGCCGAGCTTAAGGAGGTGTCCAGCCAAGAAAGCAATGCCAGGCAA<br/> ATGTGGGCAGCCAGGAGCCAGCAGACAGAGGGAGAAGCGCCTGGCCCCTGGCCAAATGCAACACTAACACCAGCAACAACACGGAGG<br/> AGGAGAAGAAGACGAAAAAGAAGGATGCGATCGTGGTGGACCCGTCCAGCAACCTGTACTACCGCTGGCTGACCGCCATCGCCCTGCCT<br/> GTCTTCTATAACTGGTATCTGCTTATTTGCAGGGCCTGTTTCGATGAGCTGCAGTCCGAGTACCTGATGCTGTGGCTGGTCTGGACTACTC<br/> GGCAGATGTCCTGTATGTCTTGGATGTGCTTGTACGAGCTCGGACAGGTTTTCTCGAGCAAGGCTTAATGGTCAGTGATACCAACAGGCTG<br/> TGGCAGCATTACAAGACGACCACGCAGTTCAAGCTGGATGTGTTGTCCCTGGTCCCCACCGACCTGGCTTACTTAAAGGTGGGCACAAAC<br/> TACCCAGAAGTGAGGTTCAACCGCCTACTGAAGTTTTCCCGGCTCTTTGAATCTTTGACCGCACAGAGACAAGGACCAACTACCCCAAT<br/> ATGTTCAAGGATTGGGAACTTGGTCTTGTACATTCTCATCATCCACTGGAATGCCTGCATCTACTTTGCCATTTCCAAGTTCATTGGTTTT<br/> GGGACAGACTCCTGGGTCTACCCAAACATCTCAATCCCAGAGCATGGGCGCCTCTCCAGGAAGTACATTTACAGTCTCTACTGGTCCACCT<br/> TGACCCTTACCACCATTGGTGAGACCCCAACCCCGTGAAGATGAGGAGTATCTCTTTGTGGTTCGTAGACTTCTTGGTGGGTGTTCTGAT<br/> TTTTGCCACCATTGTGGGCAATGTGGGCTCCATGATCTCGAATATGAATGCCTCACGGGCAGAGTCCAGGCCAAGATTGATTCCATCAAG<br/> CAGTACATGCAGTTCCGCAAGGTCACCAAGGACTTGGAGACGCGGGTTATCCGGTGGTTTTGACTACCTGTGGGCCAACAAAGAAGACGGT<br/> GGATGAGAAGGAGGTGCTCAAGAGCCTCCCAGACAAGCTGAAGGCTGAGATCGCCATCAACGTGCACCTGGACACGCTGAAGAAGGTT<br/> CGCATCTTCCAGGACTGTGAGGCAGGGCTGCTGGTGGAGCTGGTGTGAAGCTGCGACCCACTGTGTTTCCAGCCCTGGGGATTATATCTGC<br/> AAGAAGGGAGATATTGGGAAGGAGATGTACATCATCAACGAGGGCAAGCTGGCCGTGGTGGCTGATGATGGGGTCACCCAGTTCGTGGT<br/> CCTCAGCGATGGCAGCTACTTCCGGGAGATCAGCATTCTGAACATCAAGGGGAGCAAGTCGGGGAAACCGCAGGACGGCCAACATCCGCA<br/> GCATTGGTACTCAGACCTGTTCTGCCTCTCAAAGGACGATCTCATGGAGGCCCTCACCGAGTACCCGAAGCCAAGAAGGCCCTGGAG<br/> GAGAAAGGACGGCAGATCCTGATGAAAGACAACCTGATCGATGAGGAGCTGGCCAGGGCGGGCGCGGACCCCAAGGACCTTGAGGAGA<br/> AAGTGGAGCAGCTGGGGTCTCCCTGGACACCCTGCAGACCAGTTTTGCACGCCTCCTGGCTGAGTACAACGCCACCCAGATGAAGATG<br/> AAGCAGCTCTCAGCCAACCTGGAAGCCAGGTGAAGGGTGGTGGGACAAGCCCCTGGCTGATGGGGAAGTCCCGGGGATGCTACAA<br/> AAACAGAGGACAAACAACAGTGA</p> |
| CDS, coding sequence; CNGA3, cyclic nucleotide-gated channel subunit a 3; NCBI mRNA RefSeq, National Center for Biotechnology Information mRNA reference sequence. |                                                                                                                                                                                                                                                                                                                                                                                                                                                                                                                                                                                                                                                                                                                                                                                                                                                                                                                                                                                                                                                                                                                                                                                                                                                                                                                                                                                                                                                                                                                                                                                                                                                                                                                                                                                                                                                                                                                                                                                                                                                                                                                                                                                                                                                                                                            |

Table SIII. Restriction enzyme recognition site, 3xFLAG tag and Kozak sequences of the CNGA3 wild-type plasmid.

---

| Plasmid                                    | CNGA3 wild-type                                                        |
|--------------------------------------------|------------------------------------------------------------------------|
| Restriction enzyme recognition site, 5'→3' | <i>Hind</i> III, AAGCTT; <i>Bam</i> HI, GGATCC                         |
| Kozak, 5'→3'                               | GCCACCATGG                                                             |
| 3xFLAG, 5'→3'                              | GACTACAAGGACCACGACGGTGAC<br>TACAAGGACCACGACATCGACTACAAGGACGACGACGACAAG |

---

CNGA3, cyclic nucleotide-gated channel subunit a 3.

---
